# Supplementary material for: High-efficiency self-healing conductive composites from HPAMAM and CNTs
Source: Royal Society of Chemistry journal article supplement (doi:10.1039/c5ta01795e), 2015-01-01
Supplement: c5ta01795e1.pdf [file c5ta01795e1.pdf]

## Electronic Supplementary Information

---

### High-Efficiency Self-healing Conductive Composite from HPAMAM and CNTs

*Wen Yang, <sup>\*a</sup> Jian Song,<sup>a</sup> Xiaotian Wu,<sup>a</sup> Xiaoji Wang,<sup>a</sup> Wei Liu,<sup>a</sup> Longzhen Qiu<sup>b</sup> and Wentao Hao<sup>\*a</sup>*

<sup>a</sup> Department of Polymer Materials & Engineering, Hefei University of Technology, 193 Tunxi Road, Hefei 230009, P. R. China.

<sup>b</sup> Key Lab of Special Display Technology, Ministry of Education, National Engineering Lab of Special Display Technology, National Key Lab of Advanced Display Technology, Academy of Opto-Electronic Technology, Hefei University of Technology, Hefei 230009, P. R. China

\*To whom all correspondence should be addressed. E-mail: [wenyang@hfut.edu.cn](mailto:wenyang@hfut.edu.cn); [wentao\\_hao@hfut.edu.cn](mailto:wentao_hao@hfut.edu.cn)

## Experimental section

*Materials:* Cystamine dihydrochloride ( $\geq 98\%$ , Changzhou Furong Chemical Co.), (N-aminoethyl piperazine (AEPZ, 99%, Aladdin Chemicals), Multi-wall carbon nanotubes (CNTs, diameter  $\leq 8$  nm, length 0.5~2  $\mu\text{m}$ , Beijing Jiaanheng Science & Technology Co. Ltd). Dichloromethane ( $\geq 99.5\%$ ), methanol ( $\geq 99.5\%$ ) and acetone ( $\geq 99.5\%$ ) were purchased from Sinopharm Chemical Reagent Co., Ltd. N,N'-Cystaminebisacrylamide (CBA) and HPAMAM were synthesized according to the similar method described in our previous publication.<sup>S1</sup>

*Preparation of HPAMAM strips:* the synthesized HPAMAM was precipitated by acetone twice first, and then dissolved in methanol; the HPAMAM solution was poured into tanks, standing at room temperature for 24 hours; the samples were transferred to a vacuum oven (30 °C, -0.05 MPa) drying for 4 days. The weight of each of the obtained strips was about 0.5 g.

*Preparation of Sushi-like self-healing conductive composite:* CNTs (0.1 g) were blended with 2 mL HPAMAM/methanol solution first; the mixed solution was then dropped onto the surface of as prepared HPAMAM strip; after drying at 50 °C completely, the CNTs coated strip was rolled up to obtain Sushi-like composite.

*Materials characterization:*  $^1\text{H}$  nuclear magnetic resonance (NMR) spectra were recorded on a 600MHz NMR spectrometer (Agilent Technologies VNMR5600) with tetramethylsilane as the internal reference. HPAMAM sample was dissolved with deuterated DMSO. The stress-strain behavior of the original HPAMAM sample and the repaired HPAMAM sample was tested on a universal testing machine (Instron 5565A), under a tensile speed of 100 mm/min. The modulus of the HPAMAM samples was determined according to  $E = \Delta\sigma/\Delta\epsilon$ , where the E is the modulus,  $\Delta\sigma$  is the increment of stress, and  $\Delta\epsilon$  is the corresponding strain in the initial stage of the stress-strain curves. The modulus of HPAMAM was about  $6.02 \pm 1.03$  MPa. Differential scanning calorimetry (DSC) curves were recorded on a DSC-822e (Mettler Toledo, Swiss) in a dry nitrogen atmosphere. The heating rate was 10 °C/min. Fluorescent pictures of the Sushi-like structure was recorded by a digital camera (Olympus SP-620UZ) under UV irradiation with wavelength of 365nm.

*Conductivity characterization:* An AC power supply of 6 V was used in this work. The resistance of the Sushi-like conductive composites was measured by a digital Ohm meter (Cat-II, Electro-Tek). The surface conductivity of the conductive composites before wrapping was determined by a multifunction digital four-probe tester ST-2258A (Suzhou Jingge Electronic Co., Ltd.).

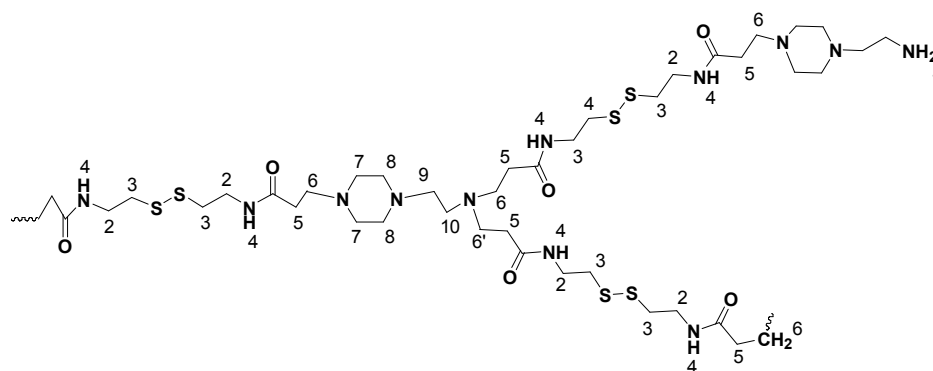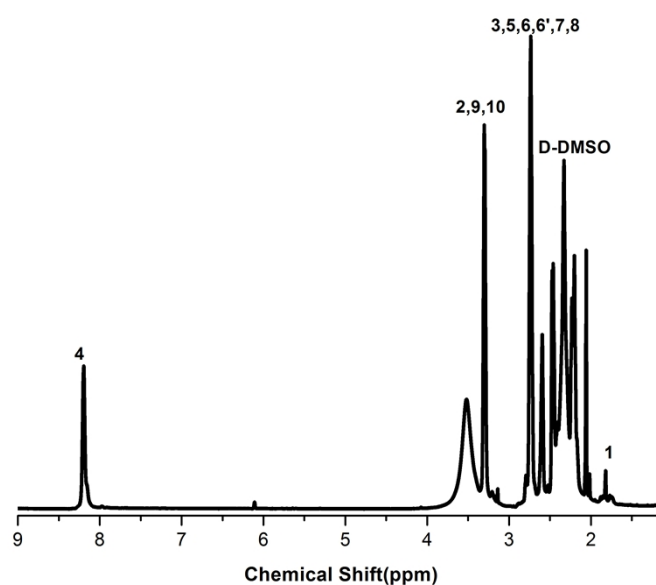

**Fig. S1** <sup>1</sup>H NMR spectrum of HPAMAM sample

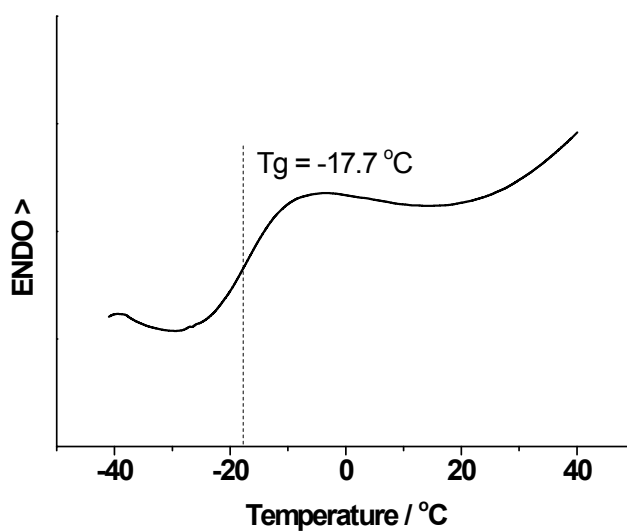

**Fig. S2** Glass transition temperature of HPAMAM determined by DSC measurement

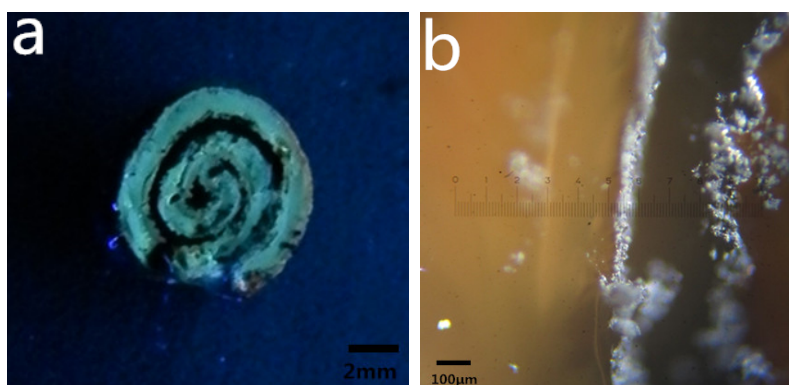

**Fig. S3** (a) HPAMAM/CNT self-healing conductive composites under UV irradiation, clear Sushi-like structure could be seen; (b) local parts of the composite, indicating the thickness of the CNT layer to be about 200 μm.

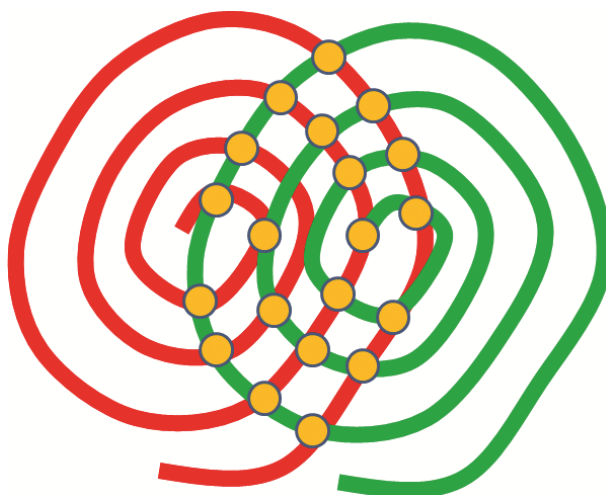

**Fig. S4** Overlapping of conductive pathways Conductive Sushi when the fracture surfaces are contact with each other. The yellow points indicate the contact points of conductive pathways.

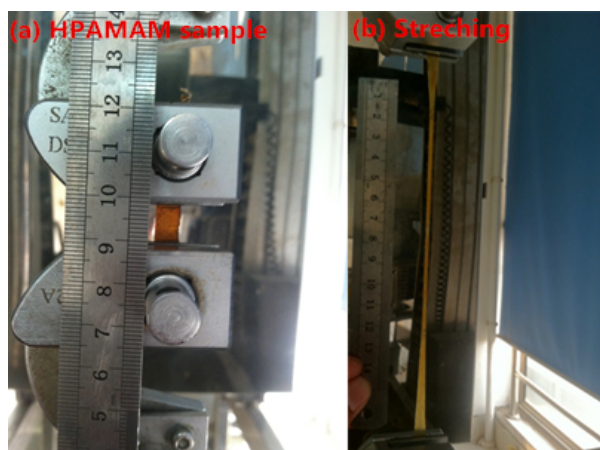

**Fig. S5** (a) HPAMAM sample in original state: the gauge was 10 mm; (b) HPAMAM sample was extended to a length more than 150 mm

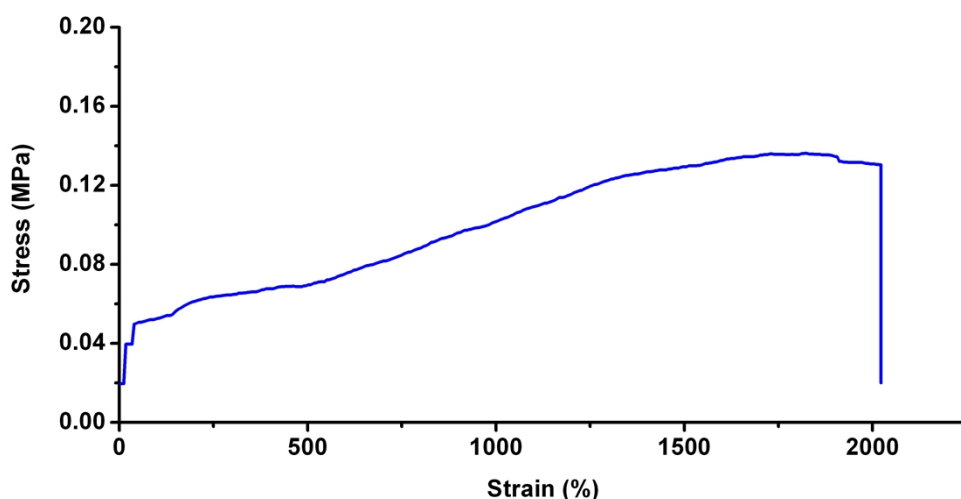

**Fig. S6** Stress-strain curve of HPAMAM

At room temperature, the HPAMAM sample showed good flexibility and could be largely extended (Fig. S5†). The stress-strain behavior of the HPAMAM is very special. As shown in Figure S6†, the elongation at break was as large as 2000%. It was only found in a few hydrogels.<sup>S2,S3</sup> For many of the self-healing materials, the strain was less than 1000% (reference to Table S1). On the other hand, the maximum strength of the HPAMAM is about 120 kPa, comparable to that of the supramolecular polymers used in Dickey's report<sup>S4</sup> and in self-healing supercapacitors.<sup>S5</sup> Moreover, the strength of HPAMAM is of great potential to be improved through combining with graphene oxide.<sup>S6</sup> It is highly possible that a lot of functional self-healing materials with better mechanical performance can be obtained with HPAMAM as the substrate polymer.

**Table S1** Self-healing ability of polymers materials/hydrogels

| No. | Original stress (MPa) | Time for 50% recovery of stress | Time for more than 90% stress recovery | Original strain (%) | Time for 50% recovery of strain | Time for more than 90% strain recovery | Mechanism                             | References    |
|-----|-----------------------|---------------------------------|----------------------------------------|---------------------|---------------------------------|----------------------------------------|---------------------------------------|---------------|
| 1   | ~ 0.5                 | ~ 1 min                         | ~ 1 h                                  | ~550                | ~ 1 min                         | > 10 min                               | H-bonds                               | S6            |
| 2   | ~ 3.1                 | ~ 6 min                         | ~ 60 min                               | ~500                | ~ 6 min                         | ~ 60 min                               | ionic interaction                     | S7            |
| 3   | ~ 0.5                 | ~ 15 min                        | ~ 60 min                               | ~70                 | ~ 15 min                        | ~ 60 min                               | disulfide bonds                       | S8            |
| 4   | ~ 3.5                 | ~ 120 min                       | > 180 min                              | ~650                | ~ 60 min                        | ~ 180 min                              | H-bonds                               | S9            |
| 5   | ~ 0.18                | ~ 1 h                           | ~ 24 h                                 | ~200                | > 1 h                           | ~ 24 h                                 | disulfide bonds                       | S10           |
| 6   | ~ 1.9                 | > 1 h                           | ~ 24 h                                 | ~800                | ~ 1 h                           | ~ 24 h                                 | H-bonds                               | S11           |
| 7   | ~ 0.275               | > 1 h                           | > 48 h                                 | ~400                | ~ 1 h                           | > 48 h                                 | H-bonds                               | S12           |
| 8   | ~ 0.08                | > 1 h                           | ~ 10 h                                 | ~1600               | > 1 h                           | ~ 10 h                                 | H-bonds                               | S2            |
| 9   | ~ 0.08                | ~ 2 h                           | ~ 6 h                                  | ~500                | > 1 h                           | ~ 6 h                                  | Diaryl-bibenzofuranone bonds          | S13           |
| 10  | ~ 0.35                | > 2 h                           | ~ 24 h                                 | ~5000               | ~ 1 h                           | ~ 24 h                                 | H-bonds                               | S3            |
| 11  | ~ 1.35                | ~ 0.5 h                         | ~ 18 h                                 | ~600                | > 5 h                           | > 18 h                                 | H-bonds                               | S14           |
| 12  | ~ 0.025               | > 24 h                          | > 48 h                                 | ~ 100               | > 24 h                          | > 48 h                                 | disulfide bonds/acryl-hydrazone bonds | S15           |
| 13  | ~ 1.5                 | > 1 day                         | >10 days                               | ~450                | > 1 day                         | > 10 days                              | D-A reaction                          | S16           |
| 14  | 0.13                  | < 1 min                         | ~ 5 min                                | ~2000               | ~ 1 min                         | ~ 5 min                                | H-bonds/disulfide bonds               | Present Work* |

**Note:** the dynamic self-healing process of HPAMAM can be found in the online video.

**Table S2** Variation of electric resistance of the self-healing conductive composites

| Time (min) | Resistance of Sample #1 (k $\Omega$ ) | Resistance of Sample #2 (k $\Omega$ ) | Resistance of Sample #3 (k $\Omega$ ) | Average Resistance (k $\Omega$ ) | Standard Deviation |                      |
|------------|---------------------------------------|---------------------------------------|---------------------------------------|----------------------------------|--------------------|----------------------|
| 1          | 1.14                                  | 1.20                                  | 1.15                                  | 1.16                             | 0.03               | Before Disconnection |
| 2          | 1.11                                  | 1.21                                  | 1.17                                  | 1.16                             | 0.05               |                      |
| 3          | 1.10                                  | 1.18                                  | 1.20                                  | 1.16                             | 0.05               |                      |
| 4          | 1.08                                  | 1.17                                  | 1.18                                  | 1.14                             | 0.06               |                      |
| 5          | 1.06                                  | 1.15                                  | 1.16                                  | 1.12                             | 0.06               |                      |
| 6          | 1.05                                  | 1.14                                  | 1.16                                  | 1.12                             | 0.06               |                      |
| 7          | 1.04                                  | 1.13                                  | 1.15                                  | 1.11                             | 0.06               |                      |
| 8          | 1.04                                  | 1.13                                  | 1.14                                  | 1.10                             | 0.06               |                      |
| 9          | 1.02                                  | 1.12                                  | 1.13                                  | 1.09                             | 0.06               |                      |
| 10         | 1.02                                  | 1.12                                  | 1.12                                  | 1.09                             | 0.06               |                      |
| 1'         | 3.74                                  | 3.29                                  | 3.89                                  | 3.64                             | 0.31               | After connection     |
| 2'         | 3.51                                  | 3.24                                  | 3.01                                  | 3.25                             | 0.25               |                      |
| 3'         | 2.96                                  | 2.85                                  | 2.75                                  | 2.85                             | 0.11               |                      |
| 4'         | 2.68                                  | 2.80                                  | 2.65                                  | 2.71                             | 0.08               |                      |
| 5'         | 2.56                                  | 2.68                                  | 2.50                                  | 2.58                             | 0.09               |                      |
| 6'         | 2.40                                  | 2.33                                  | 2.45                                  | 2.39                             | 0.06               |                      |
| 7'         | 2.29                                  | 2.20                                  | 2.37                                  | 2.29                             | 0.09               |                      |
| 8'         | 2.23                                  | 2.12                                  | 2.21                                  | 2.19                             | 0.06               |                      |
| 9'         | 2.14                                  | 2.09                                  | 2.07                                  | 2.10                             | 0.04               |                      |
| 10'        | 1.98                                  | 1.90                                  | 1.88                                  | 1.92                             | 0.05               |                      |
| 11'        | 1.79                                  | 1.74                                  | 1.88                                  | 1.80                             | 0.07               |                      |
| 12'        | 1.67                                  | 1.69                                  | 1.76                                  | 1.71                             | 0.05               |                      |
| 13'        | 1.58                                  | 1.59                                  | 1.67                                  | 1.61                             | 0.05               |                      |
| 14'        | 1.43                                  | 1.45                                  | 1.55                                  | 1.48                             | 0.06               |                      |
| 15'        | 1.31                                  | 1.33                                  | 1.44                                  | 1.36                             | 0.07               |                      |
| 16'        | 1.27                                  | 1.35                                  | 1.30                                  | 1.31                             | 0.04               |                      |
| 17'        | 1.16                                  | 1.24                                  | 1.21                                  | 1.20                             | 0.04               |                      |
| 18'        | 1.15                                  | 1.24                                  | 1.19                                  | 1.19                             | 0.05               |                      |

**Table S3** Variation of electric resistance of the self-healing conductive composites poorly

aligned

| Time (min) | Resistance of Sample #1 (k $\Omega$ ) | Resistance of Sample #2 (k $\Omega$ ) | Resistance of Sample #3 (k $\Omega$ ) | Average Resistance (k $\Omega$ ) | Standard Deviation |                      |
|------------|---------------------------------------|---------------------------------------|---------------------------------------|----------------------------------|--------------------|----------------------|
| 1          | 1.05                                  | 1.10                                  | 1.09                                  | 1.08                             | 0.03               | Before Disconnection |
| 2          | 1.01                                  | 1.08                                  | 1.07                                  | 1.05                             | 0.04               |                      |
| 3          | 0.97                                  | 1.06                                  | 1.07                                  | 1.03                             | 0.06               |                      |
| 4          | 0.96                                  | 1.05                                  | 1.06                                  | 1.02                             | 0.06               |                      |
| 5          | 0.95                                  | 1.06                                  | 1.07                                  | 1.03                             | 0.07               |                      |
| 6          | 0.96                                  | 1.05                                  | 1.03                                  | 1.01                             | 0.05               |                      |
| 7          | 0.95                                  | 1.06                                  | 1.05                                  | 1.02                             | 0.06               |                      |
| 8          | 0.95                                  | 1.05                                  | 1.03                                  | 1.01                             | 0.05               |                      |
| 9          | 0.95                                  | 1.03                                  | 1.01                                  | 1.00                             | 0.04               |                      |
| 10         | 0.94                                  | 1.04                                  | 1.02                                  | 1.00                             | 0.05               |                      |
| 1'         | 7.50                                  | 6.84                                  | 7.10                                  | 7.15                             | 0.33               | After connection     |
| 2'         | 5.31                                  | 4.06                                  | 5.25                                  | 4.87                             | 0.71               |                      |
| 3'         | 3.01                                  | 3.15                                  | 3.45                                  | 3.20                             | 0.22               |                      |
| 4'         | 2.51                                  | 2.64                                  | 2.85                                  | 2.67                             | 0.17               |                      |
| 5'         | 2.42                                  | 2.52                                  | 2.70                                  | 2.55                             | 0.14               |                      |
| 6'         | 2.21                                  | 2.49                                  | 2.58                                  | 2.43                             | 0.19               |                      |
| 7'         | 2.18                                  | 2.38                                  | 2.47                                  | 2.34                             | 0.15               |                      |
| 8'         | 2.14                                  | 2.26                                  | 2.40                                  | 2.27                             | 0.13               |                      |
| 9'         | 2.10                                  | 2.19                                  | 2.31                                  | 2.20                             | 0.11               |                      |
| 10'        | 2.01                                  | 2.10                                  | 2.27                                  | 2.13                             | 0.13               |                      |
| 11'        | 1.98                                  | 2.02                                  | 2.17                                  | 2.06                             | 0.10               |                      |
| 12'        | 1.94                                  | 1.96                                  | 2.10                                  | 2.00                             | 0.09               |                      |
| 13'        | 1.92                                  | 1.87                                  | 1.95                                  | 1.91                             | 0.04               |                      |
| 14'        | 1.90                                  | 1.79                                  | 1.80                                  | 1.83                             | 0.06               |                      |
| 15'        | 1.87                                  | 1.64                                  | 1.71                                  | 1.74                             | 0.12               |                      |
| 16'        | 1.80                                  | 1.53                                  | 1.62                                  | 1.65                             | 0.14               |                      |
| 17'        | 1.71                                  | 1.40                                  | 1.47                                  | 1.53                             | 0.16               |                      |
| 18'        | 1.64                                  | 1.28                                  | 1.27                                  | 1.40                             | 0.21               |                      |

## References

- S1 W. Yang and C. Y. Pan, *Macromol. Rapid Commun.*, 2009, **30**, 2096.
- S2 K. Haraguchi, K. Uyama and H. Tanimoto, *Macromol. Rapid Commun.*, 2011, **32**, 1253.
- S3 J. Q. Liu, G. S. Song, C. C. He and H. L. Wang, *Macromol. Rapid Commun.*, 2013, **34**, 1002.
- S4 E. Palteau, S. Reece, S. C. Desai, M. E. Smith, and M. D. Dickey, *Adv. Mater.*, 2013, **25**, 1589.
- S5 H. Wang, B.W. Zhu, W. C. Jiang, Y. Yang, W. R. Leow, H. Wang and X. D. Chen, *Adv. Mater.*, 2014, **26**, 3638.
- S6 C. Wang, N. Liu, R. Allen, J. B.-H. Tok, Y. Wu, F. Zhang, Y. Chen and Z. N. Bao, *Adv. Mater.*, 2013, **25**, 5785.
- S7 A. Reisch, E. Roger, T. Phoeung, C. Anthaum, C. Orthlieb, F. Boulmedais, P. Lavalle, J. B. Schlenoff, B. Frisch and P. Schaaf, *Adv. Mater.*, 2014, **26**, 2547.
- S8 J. Canadell, H. Goossens and B. Klumperman, *Macromolecules*, 2011, **44**, 2536.
- S9 P. Cordier, F. Tournilhac, C. Soulié-Ziakovic and L. Leibler, *Nature*, 2008, **451**, 977.
- S10 Y. Amamoto, H. Otsuka, A. Takahara and K. Matyjaszewski, *Adv. Mater.*, 2012, **24**, 3975.
- S11 Y. L. Chen, A. M. Kushner, G. A. Williams and Z. B. Guan, *Nat. Chem.*, 2012, **4**, 467.
- S12 H. Zhang, H. Xia and Y. Zhao, *ACS Macro Lett.*, 2012, **1**, 1233.
- S13 K. Imato, M. Nishihara, T. Kanehara, Y. Amamoto, A. Takahara and H. Otsuka, *Angew. Chem. Int. Ed.*, 2012, **51**, 1138.
- S14 J. Hentschel, A. M. Kushner, J. Ziller and Z. B. Guan, *Angew. Chem. Int. Ed.*, 2012, **51**, 10561.
- S15 G. H. Deng, F. Y. Li, H. X. Yu, F. Y. Liu, C. Y. Liu, W. X. Sun, H. F. Jiang and Y. M. Chen, *ACS Macro Lett.*, 2012, **1**, 275.
- S16 C. Zeng, H. Seino, J. Ren, K. Hatanaka, and N. Yoshie, *Macromolecules*, 2013, **46**, 1794.
